# Supplementary material
Source: HighWire-hosted journal article supplement (http://cmajopen.ca/highwire/filestream/90035/field_highwire_adjunct_files/2/open-2022-0123-original-submission.pdf)
Supplement: open-2022-0123-original-submission.pdf [file open-2022-0123-original-submission.pdf]

Few patients receive care from their family physician near the end of life after referral to home care: A retrospective cohort study

| Author<br>Name/Credentials/ORCID                                   | Affiliations                                                                                                                                            |
|--------------------------------------------------------------------|---------------------------------------------------------------------------------------------------------------------------------------------------------|
| Mary Scott, BA MSc<br>ORCID: 0000-0002-1745-0820                   | Bruyere Research Institute; Ottawa Hospital Research Institute; Department of Medicine, School of Epidemiology and Public Health, University of Ottawa. |
| Colleen Webber, PhD<br>ORCID: 0000-0001-9193-5386                  | Ottawa Hospital Research Institute; Bruyère Research Institute; ICES.                                                                                   |
| Anna E. Clarke<br>ORCID:                                           | ICES; Ottawa Hospital Research Institute                                                                                                                |
| Abe Hafid, MPH<br>ORCID: 0000-0002-2853-6881                       | Department of Family Medicine, McMaster University.                                                                                                     |
| Sarina R. Isenberg, MA, PhD<br>ORCID: 0000-0001-6059-5366          | Bruyère Research Institute; Department of Medicine, University of Ottawa; Department of Family and Community Medicine, University of Toronto.           |
| Aaron Jones, MSc, PhD<br>ORCID: 0000-0002-6282-3614                | Health Research Methods, Evidence and Impact, McMaster University; ICES                                                                                 |
| Amy T. Hsu, PhD<br>ORCID: 0000-0002-2747-4121                      | Bruyère Research Institute; Ottawa Hospital Research Institute.                                                                                         |
| Katrin Conen, MD<br>ORCID:                                         | Department of Medicine, McMaster University.                                                                                                            |
| James Downar, MD, MHSc<br>ORCID: 0000-0001-7479-1560               | Division of Palliative Care, Department of Medicine, University of Ottawa.                                                                              |
| Douglas G. Manuel, MD, MSc,<br>FRCPC<br>ORCID: 0000-0003-0912-0845 | Dept of Family Medicine, University of Ottawa; Ottawa Hospital Research Institute; Bruyere Research Institute; ICES.                                    |
| Michelle Howard, MSc, PhD<br>ORCID: 0000-0001-8127-5492            | Department of Family Medicine, McMaster University.                                                                                                     |
| Peter Tanuseputro, MHSc, MD<br>ORCID: 0000-0002-4409-0795          | Bruyère Research Institute; Department of Medicine, University of Ottawa; Ottawa Hospital Research Institute; ICES.                                     |

**Corresponding Author**

Mary Scott – [mscott@bruyere.org](mailto:mscott@bruyere.org), Bruyere Research Institute – 43 Bruyere St. Ottawa, ON.

**Sources of support**

This study was supported by ICES, which is funded by an annual grant from the Ontario Ministry of Health (MOH) and the Ministry of Long-Term Care (MLTC). The opinions, results and conclusions reported in this paper are those of the authors and are independent from the funding sources. No endorsement by ICES, the MOH or MLTC is intended or should be inferred. The main author was supported by the Centre for Individualized Health, a privately funded grant, held at Bruyère Research Institute.

**Prior presentation**

This work has not been previously presented at any conferences or shared with anyone outside the author list above.

Word count: 2482 words

Number of tables (1) and figures (2)

Confidential

## Abstract

### Introduction

Physician home visits are associated with better health outcomes, yet most dying patients never receive one. Our objectives were to describe the receipt of physician home visits during the last year of life following a referral to homecare – a sign patients can no longer live independently – and to measure associations between patient characteristics and receipt of a home visit.

### Methods

We conducted a retrospective cohort study using linked population-based health administrative databases housed at ICES. We identified decedents in Ontario between April 1, 2013-March 31, 2018, who were receiving primary care and were referred to publicly funded homecare services. We described the provision of physician home visits, telephone management and office visits. Multinomial logistic regression produced adjusted odds ratio of home visits received from a rostered primary care physician.

### Results

Of the 58,753 decedents in our cohort, 5.3% received a home visit from their family physician. Patient characteristics associated with higher odds of receiving home visits compared to office or telephone care were being female (OR: 1.28 [95% CI: 1.21-1.35 p<.0001]), being 85 years of age or older (OR 2.42 [95% CI: 1.80 -3.26], and living in rural areas (OR: 1.09 [95% CI: 1.00-1.18, p 0.047]). Increased odds were associated with homecare referrals from patient's family physician (OR: 1.49 [95% CI: 1.39-1.58, p<.0001]) and referrals occurring during a hospital admission (OR: 1.20 [95% CI: 1.13-1.28, p<.0001]).

### Interpretation

Few dying patients receive home-based physician care. Patient characteristics may only explain part of low home-based service delivery.

**Keywords:** *primary care, health services, capitation models, end-of-life care, palliative care*

**Abbreviations:** *no abbreviations used, unless typical and specified with full name in manuscript*

## Introduction

The end-of-life period is difficult for many patients and their families. Care at home is often desired,<sup>1</sup> however, most patients utilize acute care during the last few months of life.<sup>2,3</sup> Home visits from physicians during the end-of-life period are associated with better quality of life,<sup>4</sup> reduced acute care use and costs,<sup>5,6</sup> and more out-of-hospital deaths.<sup>5</sup> However, the majority of dying patients never receive a physician home visit.<sup>7,8</sup> Studies have shown patient and physician characteristics are associated with home visits, including that physicians who have an existing relationship with their patients may be more likely to perform home visits.<sup>9,10</sup> Furthermore, an existing and ongoing relationship between patient and provider,<sup>11</sup> known as relational continuity of care, has been found to be associated with improved patient-centered outcomes.<sup>12</sup>

End-of-life care is often coordinated through primary care, including referring patients to formal homecare services (e.g., nursing, personal support worker, occupational therapy, etc.). Referral to homecare services by a physician may indicate clinical signs of decline, including a recognition of patients' increased care needs with an inability to live independently. In Ontario, those referred to publicly-funded formal homecare services are assessed with the Resident Assessment Instrument (RAI) for Home Care, a comprehensive clinical assessment tool to establish individuals' care needs. Physician-based care is not mandated, even after homecare services are initiated, and remains an optional service for physicians; however, physician involvement can provide additional care support and oversight.

This study examined patients with an existing relationship to a family doctor through capitation rostering. Rostering is a function of capitation-based remuneration models for providers, in which annual lump sum payments are given for each rostered patient to encourage retention of long-term, provider-patient relationships and to increase care continuity across all patients' life stages.<sup>13,14</sup> In the site of this study, physician home visits are remunerated as an additional service on top of annual capitation

1  
2  
3 payments and referral to homecare and to other physicians conducting home visits (e.g., palliative care  
4  
5 specialists) will not reduce annual remuneration.  
6  
7

8 It is unknown if family physicians continue caring for their rostered patients who are referred to  
9  
10 homecare services at the end of life, and if patient factors predict care continuity. Our first objective was  
11  
12 to describe end-of-life home visits from rostered physicians to patients in Ontario after physician referral  
13  
14 to homecare services. Secondary objectives were to measure associations between patient characteristics  
15  
16 and the receipt of rostered physician home visits, outpatient or management care provided by physicians,  
17  
18 as well as to explore patterns across different disease trajectories (e.g., cancer versus organ failure).  
19  
20  
21

## 22 23 Methods

### 24 25 26 *Study population*

27  
28  
29 We identified a population-based retrospective cohort of adult decedents, aged 18 to 104 years,  
30  
31 who died between March 31, 2013-March 31, 2018 in Ontario, were rostered to a primary care physician  
32  
33 through a capitation remuneration model, and who had been referred to formal homecare services during  
34  
35 the last five years of life (Appendix I). We excluded those who were ineligible for OHIP three years before  
36  
37 death and those admitted to a residential long-term care institution after referral. We identified  
38  
39 individuals and their characteristics using multiple, linked, health administrative databases (Supplemental  
40  
41 Appendix II). If an individual was referred more than once, the referral within or closest to the last 12  
42  
43 months of life was used. Homecare referral by a physician was chosen as an index event since it indicates  
44  
45 physician recognition of increasing patient need.  
46  
47  
48  
49

### 50 51 *Study design and data sources*

52  
53 Rostering was determined using the Client Agency Program Enrolment (CAPE), which captures  
54  
55 patients' enrollment to capitation-based models. Referral by a physician to homecare services and  
56  
57

1  
2  
3 services provided was captured the Ontario Health Insurance Plan (OHIP) Claims Database, which contains  
4 all physician billings, including shadow billing used in capitation-based remuneration. Emergency  
5 department visits were identified using the National Ambulatory Care Reporting System (NACRS), which  
6 holds ambulatory care records. Hospitalization records were from the Discharge Abstract Database (DAD),  
7 which contains records of each acute care admission. Death was determined using the Ontario Vital  
8 Statistics data (ORGD). These datasets were linked using unique encoded identifiers and analyzed at ICES.  
9  
10  
11  
12  
13  
14  
15

### 16 17 *Study variables*

18  
19  
20 The primary outcome was receiving community-based care from a rostered physician after  
21 referral to homecare services, captured according to the following hierarchy: 1) the patient received at  
22 least one home visit from rostered physician, 2) the patient received office-based or telephone-based care  
23 from rostered physician, or 3) the patient did not receive any care from their rostered physician.  
24  
25  
26  
27  
28  
29

30 Secondary outcomes included the frequency of physician home visits received after the patients'  
31 referral to homecare services during their last year of life, presence and number of home visits provided  
32 by non-rostered physicians (such as palliative care physicians), visit patterns across patients' disease  
33 trajectories, and timing of the referral to home care in relation to patients' death, including whether it  
34 occurred during a hospitalization. Since palliative care has only recently been recognized as a medical  
35 specialty, we used a validated algorithm designed to identify palliative care physicians in health  
36 administrative data<sup>15,16</sup> based on their proportion of palliative care billings across the previous two years  
37 of practice, with those billing  $\geq 10\%$  as specialists and  $< 10\%$  as generalists.  
38  
39  
40  
41  
42  
43  
44  
45  
46  
47

48 Patient characteristics were age, sex, area-level income quintile, immigration status, rurality  
49 based on postal code at time of death, disease trajectory based on patients' cause of death and number  
50 and prevalence of chronic conditions based on previously developed algorithms at ICES.<sup>17-25</sup>  
51  
52  
53  
54  
55  
56  
57  
58  
59  
60

1  
2  
3 Decedents were categorized according to major illness trajectories, as in previous research.<sup>1,26,27</sup>  
4  
5 The trajectories are terminal illness (e.g., cancer), organ failure (e.g., chronic heart failure), frailty (e.g.,  
6  
7 Alzheimer disease), sudden death (i.e., unanticipated, such as an accident) and other. Researchers  
8  
9 validated these trajectories using the International Classification of Diseases, 10th Revision (ICD-10) codes  
10  
11 and a modified Delphi process to discriminate how cause of death corresponds to similar health care  
12  
13 utilization costs and illness trajectories.<sup>28</sup> Subsequent research found these trajectories aligned with  
14  
15 palliative service initiation and intensity.<sup>29</sup>  
16  
17  
18

### 19 20 *Statistical analysis*

21  
22  
23 For descriptive analyses on patients referred to homecare, we calculated frequencies and  
24  
25 proportions for categorical and binary variables and means, medians, interquartile ranges, distributions,  
26  
27 and standard deviations for continuous variables. We described visit characteristics, including visits  
28  
29 provided by non-rostered physicians, according to patients' disease trajectories. The rate of home visits  
30  
31 in the last year of life was calculated using person-time, excluding the number of days patients spent in  
32  
33 hospital. We assessed associations between each variable and the primary outcome. A multinomial  
34  
35 logistic regression model was fitted to calculate the odds of patients receiving 1) a home visit from their  
36  
37 rostered physician; or 2) no care from their rostered physician during their last year of life compared to  
38  
39 the reference category of receiving any office-based or telephone care (typical primary care) from their  
40  
41 rostered physician, independent of age, sex, income quintile, rurality, recent immigrant status, referral by  
42  
43 rostered physician, referral during hospital admission, referral during the last year of life, number of  
44  
45 chronic conditions and patients' cause of death disease trajectory. We reported adjusted odds ratios (ORs)  
46  
47 and 95% confidence intervals (CI).  
48  
49  
50

### 51 52 *Ethics*

53  
54  
55  
56  
57  
58  
59  
60

1  
2  
3 The use of data in this project was authorized under section 45 of Ontario's Personal Health  
4 Information Protection Act, which does not require review by a Research Ethics Board  
5  
6  
7

## 8 9 Results

### 10 *Study population*

11  
12  
13  
14 There were 105,816 patients referred to homecare during the last five years of life and our final  
15 descriptive cohort consisted of 58,753 patients referred by a physician within the last 12 months of life.  
16  
17 Over half (58.8%) of patients were between 60-84 years of age, there were more males (53.0%), most  
18 patients (88.2%) lived in urban areas, and 28.6% of patients had five or more chronic conditions (Table 1).  
19  
20 Half of the patients (51.3%) died of terminal illness, followed by organ failure (27.7%), frailty (15.0%),  
21 other causes (4.9%), and sudden death (1.1%).  
22  
23  
24  
25  
26  
27

### 28 *Primary outcome*

29  
30  
31 Within the cohort of decedents referred to homecare in their last year of life, 5.3% received a  
32 home visit from their rostered physician, 27.5% received office-based or telephone-based care from their  
33 rostered physician and 67.2% did not receive any care from their rostered physician after referral.  
34  
35  
36  
37

38  
39 In the adjusted model, the relative odds of receiving a home visit rather than an office visit or  
40 telephone management were 1.28 [95% CI: 1.21-1.35 p<.0001] times higher for females than that of  
41 males, 2.42 [95% CI: 1.80-3.26 p<.0001] times higher for those aged 85 years or older compared to those  
42 aged 18-44 years, and 1.09 [95% CI: 1.00-1.18, p 0.047] times higher for those living in rural areas  
43 compared to urban areas (Figure 1a). Being referred to homecare services by a rostered physician (19.7%  
44 of the cohort) was associated with 1.49 [95% CI: 1.39-1.58, p<.0001] the odds of receiving a home visit  
45 rather than visiting the office or receiving telephone management compared to than those referred by a  
46 different physician. Similarly, those referred during a hospitalization had 1.20 [95% CI: 1.13-1.28, p<.0001]  
47  
48  
49  
50  
51  
52  
53  
54  
55  
56  
57  
58  
59  
60



1  
2  
3 the odds of receiving a home visit rather than an office visit or telephone management from their rostered  
4 physician during the last year of life compared to those referred outside a hospital admission. The findings  
5 from the multinomial model found the odds of **not** receiving a home visit from a rostered physician  
6 compared to receiving typical primary care through office visits or telephone care management (Figure 1b)  
7 were significantly higher when referral to homecare was during the patient's last year of life (OR: 4.51  
8 [95%CI:4.38-4.64]).  
9  
10  
11  
12  
13  
14  
15

### 16 *Secondary outcomes*

17  
18  
19  
20 Among patients who did not receive care from their rostered physician, 31.1% received outpatient  
21 care (home visit, office appointment, or telephone management) from non-rostered physicians. Palliative  
22 care generalists and specialists provided outpatient care to 31.8% and 17.6% of patients respectively  
23 (Appendix III). Within the subgroup analysis of patients' disease trajectory, we found those with terminal  
24 illness had an average of 1.1 home visits (standard deviation (STD): 3.49) from a rostered physician in their  
25 last year of life and the most, 2.78 (STD 9.08), home visits provided by palliative care specialists than any  
26 other disease trajectory. Those dying of frailty (6.9%) had an average of 1.57 visits (STD 3.97) with the  
27 highest rate (0.32 (STD 2.78)) of end-of-life visits from a rostered physicians after referral to homecare  
28 (Appendix III). However, after adjusting for all other characteristics in the model, associations did not  
29 remain significant.  
30  
31  
32  
33  
34  
35  
36  
37  
38  
39  
40  
41  
42

### 43 *Rate of visits*

44  
45 The person-time rate of home visits in the last year of life from rostered primary care physicians  
46 remained relatively low between 12 to 4 months before death, increasing in the last three months of life  
47 (Figure 2). Home visits from a non-rostered physician occurred at a higher rate than visits from a rostered  
48 physician, with an increase in the rate of all home-based visits during the last four months of life for  
49 patients at home.  
50  
51  
52  
53  
54  
55  
56  
57  
58  
59  
60

## Interpretation

Among patients who were referred to homecare services, few received any outpatient care in the last year of life and even fewer received a home visit by their rostered physician after the referral. Patient characteristics associated with higher odds of receiving home visits from a rostered physician were being female, being 85 years of age or older, and living in rural areas, however, rates of visits remained low, even for those with these characteristics. These results suggest patient characteristics are not the driving factor in receiving an end-of-life home visit from a physician. Referrals to homecare made by the rostered physician themselves compared to another healthcare provider, patients who self-refer and referrals during a hospitalization were also associated with higher odds of subsequent home visit delivery rather than typical primary care as an office visit or telephone management.

Previous literature has highlighted unmet palliative care needs, including that only 1 in 5 Ontarians receive a home visit from any physician in their last year of life.<sup>30</sup> Our results show these gaps remain, particularly at the end of life, with 46.3% of the patients referred to homecare not receiving outpatient services from any physician during their last year of life. Although these rates are low, we observed an increased rate of visits across the last months of life which is aligned with previous end-of-life literature,<sup>31-33</sup> showing outpatient physician care intensifies during the last three months of life. This highlights how patients' care needs increase as they approach death. Our rate accounted for the days patients spent in hospital, since they would be ineligible to receive a home visit from their rostered physician in the last year of life. However, there remains a significant number of community-dwelling patients not being visited in at home, in office, or being managed over the telephone by rostered physicians near the end of life.

Alternative payment plans for primary care physicians who consistently care for their patients were introduced in Canada and other jurisdictions to increase comprehensive care, coordination, accountability, and to promote interdisciplinary care.<sup>34</sup> Since then, international findings have reported a

1  
2  
3 lower volume of care provision and fewer follow-up visits associated with these models.<sup>35,36</sup> While we are  
4  
5 not comparing remuneration models, this provides insight into why the proportion of patients referred to  
6  
7 home care (19.7%) and subsequently receiving a home visit by a rostered physician (5.3%) was low.  
8  
9 Nonetheless, almost half of the patients (42.9%) received outpatient care from non-rostered physicians,  
10  
11 suggesting hand-off or shared care may be happening.  
12  
13

### 14 15 *Strengths and limitations*

16  
17  
18 A strength of this study is that it is the largest study to describe end-of-life home visits delivered  
19  
20 by physicians with an existing patient relationship. There are also notable limitations, including that health  
21  
22 administrative data does not capture care coordination precisely, thus hand-off care between different  
23  
24 primary care providers can only be deduced. Secondly, this study focused on the provision of home visits  
25  
26 from primary care physicians due to data limitations. In Ontario, Nurse Practitioners also provide home  
27  
28 visits, thus our study is only capturing a portion of the community-based primary care. Thirdly, we  
29  
30 restricted our cohort to patients with a rostered physician who were referred by a physician to homecare  
31  
32 services. This referral is a clinical and system-level signal of increased care needs that we hypothesized  
33  
34 would lead to physician involvement. We did not ensure patients received other homecare services after  
35  
36 referral and did not exclude those who subsequently were admitted to hospital, although we accounted  
37  
38 for hospital days in the rates. Also, it is important to acknowledge that many patients in Ontario do not  
39  
40 have a rostered physician, which could limit generalizability to jurisdictions with complete rostering, and  
41  
42 may be further marginalized without a consistent provider relationship.  
43  
44  
45  
46

### 47 48 *Conclusion*

49  
50 Most patients referred by a physician to homecare did not receive a subsequent home visit from  
51  
52 their rostered physician during their last year of life in Ontario. These findings contribute to evidence on  
53  
54 community-based end-of-life care, showing that patient characteristics may not drive low rates of home  
55  
56  
57  
58  
59  
60

1  
2  
3 visits. Our findings highlight the need for research on system-level supports that could enable primary  
4  
5 care providers to remain involved as care-needs increase, to evaluate the feasibility of increasing rostered  
6  
7 physicians' capacity to provide home-based supportive care, and to outline the required supports for  
8  
9 hand-over or shared care models.  
10  
11  
12  
13  
14  
15  
16  
17  
18  
19  
20  
21  
22  
23  
24  
25  
26  
27  
28  
29  
30  
31  
32  
33  
34  
35  
36  
37  
38  
39  
40  
41  
42  
43  
44  
45  
46  
47  
48  
49  
50  
51  
52  
53  
54  
55  
56  
57  
58  
59  
60

Confidential

## Acknowledgements

This study was supported by ICES, which is funded by an annual grant from the Ontario Ministry of Health and Long-Term Care (MOHLTC). The opinions, results and conclusions reported in this paper are those of the authors and are independent from the funding sources. No endorsement by ICES or the Ontario MOHLTC is intended or should be inferred. ICES is an independent, non-profit research institute whose legal status under Ontario's health information privacy law allows it to collect and analyze health care and demographic data, without consent, for health system evaluation and improvement. Parts of this material are based on data and/or information compiled and provided by CIHI. However, the analyses, conclusions, opinions and statements expressed in the material are those of the author(s), and not necessarily those of CIHI. Parts of this report are based on Ontario Registrar General (ORG) information on deaths, the original source of which is Service Ontario. The views expressed therein are those of the author and do not necessarily reflect those of ORG or the Ministry of Government Services. Parts or whole of this material are based on data and/or information compiled and provided by Immigration, Refugees and Citizenship Canada (IRCC) current to December 20, 2021. However, the analyses, conclusions, opinions and statements expressed in the material are those of the author(s), and not necessarily those of IRCC. This study was supported by the Centre for Individualized Health at Bruyere and CIHR.

## Conflicts of interest

The authors have no conflicts of interest to report.

## References

1. Murray SA, Kendall M, Boyd K, Sheikh A. Illness trajectories and palliative care. *Bmj*. 2005;330(7498):1007-1011.
2. Bekelman JE, Halpern SD, Blankart C, et al. Comparison of site of death, health care utilization, and hospital expenditures for patients dying with cancer in 7 developed countries. *JAMA*. 2016;315(3):272-283.
3. DeCaria K, Dudgeon D, Green E, et al. Acute care hospitalization near the end of life for cancer patients who die in hospital in Canada. *Current Oncology*. 2017;24(4):256.
4. Brumley R, Enguidanos S, Jamison P, et al. Increased satisfaction with care and lower costs: results of a randomized trial of in-home palliative care. *J Am Geriatr Soc*. 2007;55(7):993-1000.
5. Almaawiy U, Pond GR, Sussman J, Brazil K, Seow H. Are family physician visits and continuity of care associated with acute care use at end-of-life? A population-based cohort study of homecare cancer patients. *Palliative Medicine*. 2013;28(2):176-183.
6. Seow H, Brazil K, Sussman J, et al. Impact of community based, specialist palliative care teams on hospitalisations and emergency department visits late in life and hospital deaths: a pooled analysis. *BMJ*. 2014;348:g3496.
7. Hsu A TP. The Delivery of Palliative and End-of-Life Care in Ontario. *Healthcare Quarterly*. 2017;20(2):6-9.
8. Tanuseputro P, Budhwani S, Bai YQ, Wodchis WP. Palliative care delivery across health sectors: A population-level observational study. *Palliat Med*. 2017;31(3):247-257.
9. Unwin BK, Tatum PE, 3rd. House calls. *American family physician*. 2011;83(8):925-938.
10. Groot MM, Vernooij-Dassen MJ, Crul BJ, Grol RP. General practitioners (GPs) and palliative care: perceived tasks and barriers in daily practice. *Palliative medicine*. 2005;19(2):111-118.
11. Haggerty JL, Reid RJ, Freeman GK, Starfield BH, Adair CE, McKendry R. Continuity of care: a multidisciplinary review. *Bmj*. 2003;327(7425):1219-1221.
12. Van Servellen G, Fongwa M, Mockus D'Errico E. Continuity of care and quality care outcomes for people experiencing chronic conditions: A literature review. *Nursing & health sciences*. 2006;8(3):185-195.
13. Devlin RA, Sarma S. Do physician remuneration schemes matter? The case of Canadian family physicians. *Journal of health economics*. 2008;27(5):1168-1181.
14. Houle SKD, McAlister FA, Jackevicius CA, Chuck AW, Tsuyuki RT. Does Performance-Based Remuneration for Individual Health Care Practitioners Affect Patient Care? *Annals of Internal Medicine*. 2012;157(12):889-899.
15. Barbera L, Hwee J, Klinger C, Jembere N, Seow H, Pereira J. Development and validation of an algorithm to identify palliative care physicians among primary care physicians practicing in Ontario using administrative health data. *CMAJ Open*. 2015;3(3).
16. Barbera L, Hwee J, Klinger C, Jembere N, Seow H, Pereira J. Identification of the physician workforce providing palliative care in Ontario using administrative claims data. *CMAJ Open*. 2015;3(3):E292-298.
17. Muggah E, Graves E, Bennett C, Manuel D. The impact of multiple chronic diseases on ambulatory care use; a population based study in Ontario, Canada. *BMC Health Services Research*. 2012;10(12).
18. Gruneir A BS, Maxwell CJ, Bai YQ, Kone AJ, Thavorn K, Petrosyan Y, Calzavara A, Wodchis WP. The association between multimorbidity and hospitalization is modified by individual demographics and physician continuity of care: a retrospective cohort study. *BMC Health Services Research*. 2016;16(151).

19. Jaakkimainen RL, Sood PR, Schultz SE. Office-based procedures among urban and rural family physicians in Ontario. *Canadian Family Physician*. 2012;58(10):e578-e587.
20. Lane NE, Maxwell CJ, Gruneir A, Bronskill SE, Wodchis WP. Absence of a Socioeconomic Gradient in Older Adults' Survival with Multiple Chronic Conditions. *EBioMedicine*. 2015;2(12):2094-2100.
21. Mondor L, Maxwell CJ, Hogan DB, et al. Multimorbidity and healthcare utilization among home care clients with dementia in Ontario, Canada: A retrospective analysis of a population-based cohort. *PLoS medicine*. 2017;14(3):e1002249.
22. Mondor L CD, Khan AI, Wodchis WP. Income inequalities in multimorbidity prevalence in Ontario, Canada: a decomposition analysis of linked survey and health administrative data. *International journal for equity in health*. 2018;17(1):90.
23. Mondor L MC, Bronskill SE, Gruneir A, Wodchis WP. The relative impact of chronic conditions and multimorbidity on health-related quality of life in Ontario long-stay home care clients. *Quality of life research : an international journal of quality of life aspects of treatment, care and rehabilitation*. 2016;25(10):2619-2632.
24. Petrosyan Y, Bai YQ, Kone Pefoyo AJ, et al. The Relationship between Diabetes Care Quality and Diabetes-Related Hospitalizations and the Modifying Role of Comorbidity. *Can J Diabetes*. 2017;41(1):17-25.
25. Thavorn K, Maxwell CJ, Gruneir A, et al. Effect of socio-demographic factors on the association between multimorbidity and healthcare costs: a population-based, retrospective cohort study. *BMJ Open*. 2017;7(10):e017264.
26. June R, Lunney JL, Daniel J, Foley, Steven Lipson, Jack M. Guralnik, . Patterns of Functional Decline at the End of Life. *Journal of American Medical Association*. 2003;289(18):2387-2392.
27. Murray E, Burns J, See TS, Lai R, Nazareth I. Interactive Health Communication Applications for people with chronic disease. *Cochrane Database of Systematic Reviews*. 2005(4). doi:10.1002/14651858.CD004274.pub4.
28. Fassbender K, Fainsinger RL, Carson M, Finegan BA. Cost trajectories at the end of life: the Canadian experience. *J Pain Symptom Manage*. 2009;38(1):75-80.
29. Murray SA, Kendall M, Boyd K, Sheikh A. Illness trajectories and palliative care. *BMJ*. 2005;330(7498):1007-1011.
30. Tanuseputro P, Budhwani S, Bai YQ, Wodchis WP. Palliative care delivery across health sectors: A population-level observational study. *Palliat Med*. 2017;31(3):247-257.
31. *Health Care Use at the End of Life in Atlantic Canada*. Ottawa, Ontario: Canadian Institute for Health Information;2011.
32. *Health Care Use at the End of Life in British Columbia*. Ottawa: Canadian Institute for Health Information;2008.
33. Barbera L, Sussman J, Viola R, et al. Factors Associated with End-of-Life Health Service Use in Patients Dying of Cancer. *Healthcare policy = Politiques de sante*. 2010;5(3):e125-143.
34. Mable AL MJ. Sharing the learning. The health transition fund. Synthesis series. Primary health care. . Synthesis series Web site. <https://www.canada.ca/en/health-canada/services/health-care-system/reports-publications/health-care-accessibility/sharing-learning-health-transition-fund-synthesis-series-primary-health-care.html>. Published 2002. Accessed November 18, 2021.
35. Kinder K. Assessing the impact of payment method and practice setting on German physicians' practice patterns. *The Journal of ambulatory care management*. 2001;24(2):11-18.
36. Vayda E. Physicians in health care management: 5. Payment of physicians and organization of medical services. *CMAJ: Canadian Medical Association Journal*. 1994;150(10):1583.

1  
2  
3  
4  
5  
6  
7  
8  
9  
10  
11  
12  
13  
14  
15  
16  
17  
18  
19  
20  
21  
22  
23  
24  
25  
26  
27  
28  
29  
30  
31  
32  
33  
34  
35  
36  
37  
38  
39  
40  
41  
42  
43  
44  
45  
46  
47  
48  
49  
50  
51  
52  
53  
54  
55  
56  
57  
58  
59  
60

Confidential



Table 1: Patient characteristics according to physician visits in their last year of life for decedents referred to homecare and who have a rostered physician for at least 6 months prior

| Patient characteristics             | Total  | Patients with a home visit from rostered physician in last year of life | Row percent | Patients with office/management from rostered physician | Row percent | Patients without encounter from rostered physician in last year of life | Row percent |
|-------------------------------------|--------|-------------------------------------------------------------------------|-------------|---------------------------------------------------------|-------------|-------------------------------------------------------------------------|-------------|
| <b>Sample size</b>                  | 58,753 | 3125                                                                    | 5.3%        | 16,162                                                  | 27.5%       | 39,466                                                                  | 67.2%       |
| <b>Age, n</b>                       |        |                                                                         |             |                                                         |             |                                                                         |             |
| 18-44                               | 1,099  | 24                                                                      | 2.2%        | 232                                                     | 21.1%       | 843                                                                     | 76.7%       |
| 45-59                               | 5,731  | 176                                                                     | 3.1%        | 1,286                                                   | 22.4%       | 4,269                                                                   | 74.5%       |
| 60-84                               | 34,568 | 1,572                                                                   | 4.5%        | 9,646                                                   | 27.9%       | 23,350                                                                  | 67.5%       |
| 85+                                 | 17,355 | 1,353                                                                   | 7.8%        | 4,998                                                   | 28.8%       | 11,004                                                                  | 63.4%       |
| <b>Sex</b>                          |        |                                                                         |             |                                                         |             |                                                                         |             |
| Female                              | 27,602 | 1,657                                                                   | 6.0%        | 7,368                                                   | 26.7%       | 18,577                                                                  | 67.3%       |
| Male                                | 31,151 | 1,468                                                                   | 4.7%        | 8,794                                                   | 28.2%       | 20,889                                                                  | 67.1%       |
| <b>Neighbourhood Income</b>         |        |                                                                         |             |                                                         |             |                                                                         |             |
| 1                                   | 13,223 | 643                                                                     | 4.9%        | 3,703                                                   | 28.0%       | 8,877                                                                   | 67.1%       |
| 2                                   | 12,868 | 659                                                                     | 5.1%        | 3,581                                                   | 27.8%       | 8,628                                                                   | 67.1%       |
| 3                                   | 11,581 | 605                                                                     | 5.2%        | 3,144                                                   | 27.1%       | 7,832                                                                   | 67.6%       |
| 4                                   | 10,644 | 607                                                                     | 5.7%        | 2,939                                                   | 27.6%       | 7,098                                                                   | 66.7%       |
| 5                                   | 10,328 | 603                                                                     | 5.8%        | 2,766                                                   | 26.8%       | 6,959                                                                   | 67.4%       |
| Missing                             | 109    | 8                                                                       | 7.3%        | 29                                                      | 26.6%       | 72                                                                      | 66.1%       |
| <b>Rural/Urban</b>                  |        |                                                                         |             |                                                         |             |                                                                         |             |
| Rural                               | 6,924  | 466                                                                     | 6.7%        | 2092                                                    | 30.2%       | 4,366                                                                   | 63.1%       |
| <b>Immigrant status</b>             |        |                                                                         |             |                                                         |             |                                                                         |             |
| Canadian born                       | 54,996 | 3,001                                                                   | 5.5%        | 15,304                                                  | 27.8%       | 36,691                                                                  | 66.7%       |
| <b>Multimorbid conditions count</b> |        |                                                                         |             |                                                         |             |                                                                         |             |
| 0                                   | 505    | 29                                                                      | 5.7%        | 153                                                     | 30.3%       | 323                                                                     | 64.0%       |
| 1                                   | 5763   | 266                                                                     | 4.6%        | 1371                                                    | 23.8%       | 4126                                                                    | 71.6%       |
| 2                                   | 11315  | 567                                                                     | 5.0%        | 3031                                                    | 26.8%       | 7717                                                                    | 68.2%       |

1  
2  
3  
4  
5  
6  
7  
8  
9  
10  
11  
12  
13  
14  
15  
16  
17  
18  
19  
20  
21  
22  
23  
24  
25  
26  
27  
28  
29  
30  
31  
32  
33  
34  
35  
36  
37  
38  
39  
40  
41  
42  
43  
44  
45  
46  
47

|                             |       |      |      |       |       |       |       |
|-----------------------------|-------|------|------|-------|-------|-------|-------|
| 3                           | 13058 | 685  | 5.2% | 3563  | 27.3% | 8810  | 67.5% |
| 4                           | 11293 | 613  | 5.4% | 3237  | 28.7% | 7443  | 65.9% |
| 5                           | 16819 | 965  | 5.7% | 4807  | 28.6% | 11047 | 65.7% |
| <b>Prevalent conditions</b> |       |      |      |       |       |       |       |
| AMI                         | 948   | 50   | 5.3% | 282   | 29.7% | 616   | 65.0% |
| Arrhythmia                  | 6320  | 365  | 5.8% | 2009  | 31.8% | 3946  | 62.4% |
| Asthma                      | 10110 | 530  | 5.2% | 2901  | 28.7% | 6679  | 66.1% |
| Cancer                      | 35706 | 1744 | 4.9% | 8682  | 24.3% | 25280 | 70.8% |
| CHF                         | 17458 | 1069 | 6.1% | 5118  | 29.3% | 11271 | 64.6% |
| COPD                        | 14690 | 855  | 5.8% | 4403  | 30.0% | 9432  | 64.2% |
| Coronary                    | 7569  | 420  | 5.5% | 2474  | 32.7% | 4675  | 61.8% |
| Dementia                    | 7599  | 611  | 8.0% | 1899  | 25.0% | 5089  | 67.0% |
| Diabetes                    | 22401 | 1140 | 5.1% | 6551  | 29.2% | 14710 | 65.7% |
| Hypertension                | 45234 | 2528 | 5.6% | 13007 | 28.8% | 29699 | 65.7% |
| IBD                         | 733   | 31   | 4.2% | 209   | 28.5% | 493   | 67.3% |
| Other Mental health         | 5215  | 251  | 4.8% | 1310  | 25.1% | 3654  | 70.1% |
| Stroke                      | 2191  | 136  | 6.2% | 547   | 25.0% | 1508  | 68.8% |
| <b>Disease trajectory</b>   |       |      |      |       |       |       |       |
| Terminal illness            | 29858 | 1384 | 4.6% | 6942  | 23.3% | 21532 | 72.1% |
| Organ Failure               | 16149 | 984  | 6.1% | 5179  | 32.1% | 9986  | 61.8% |
| Frailty                     | 8741  | 599  | 6.9% | 2782  | 31.8% | 5360  | 61.3% |
| Sudden death                | 615   | 17   | 2.8% | 239   | 38.9% | 359   | 58.4% |
| Other                       | 2879  | 114  | 4.0% | 846   | 29.4% | 1919  | 66.7% |

Legend: AMI=Acute Myocardial Infarction, CHF=Congestive Heart Failure, COPD=Chronic Obstructive Pulmonary Disease, IBD=Inflammatory Bowel Disease.

Legend: SD=Standard deviation, UPC=Usual Provider Care (a continuity of care index to measure consistent care from the rostered physician)

1  
2  
3  
4  
5  
6  
7  
8  
9  
10  
11  
12  
13  
14  
15  
16  
17  
18  
19  
20  
21  
22  
23  
24  
25  
26  
27  
28  
29  
30  
31  
32  
33  
34  
35  
36  
37  
38  
39  
40  
41  
42  
43  
44  
45  
46  
47

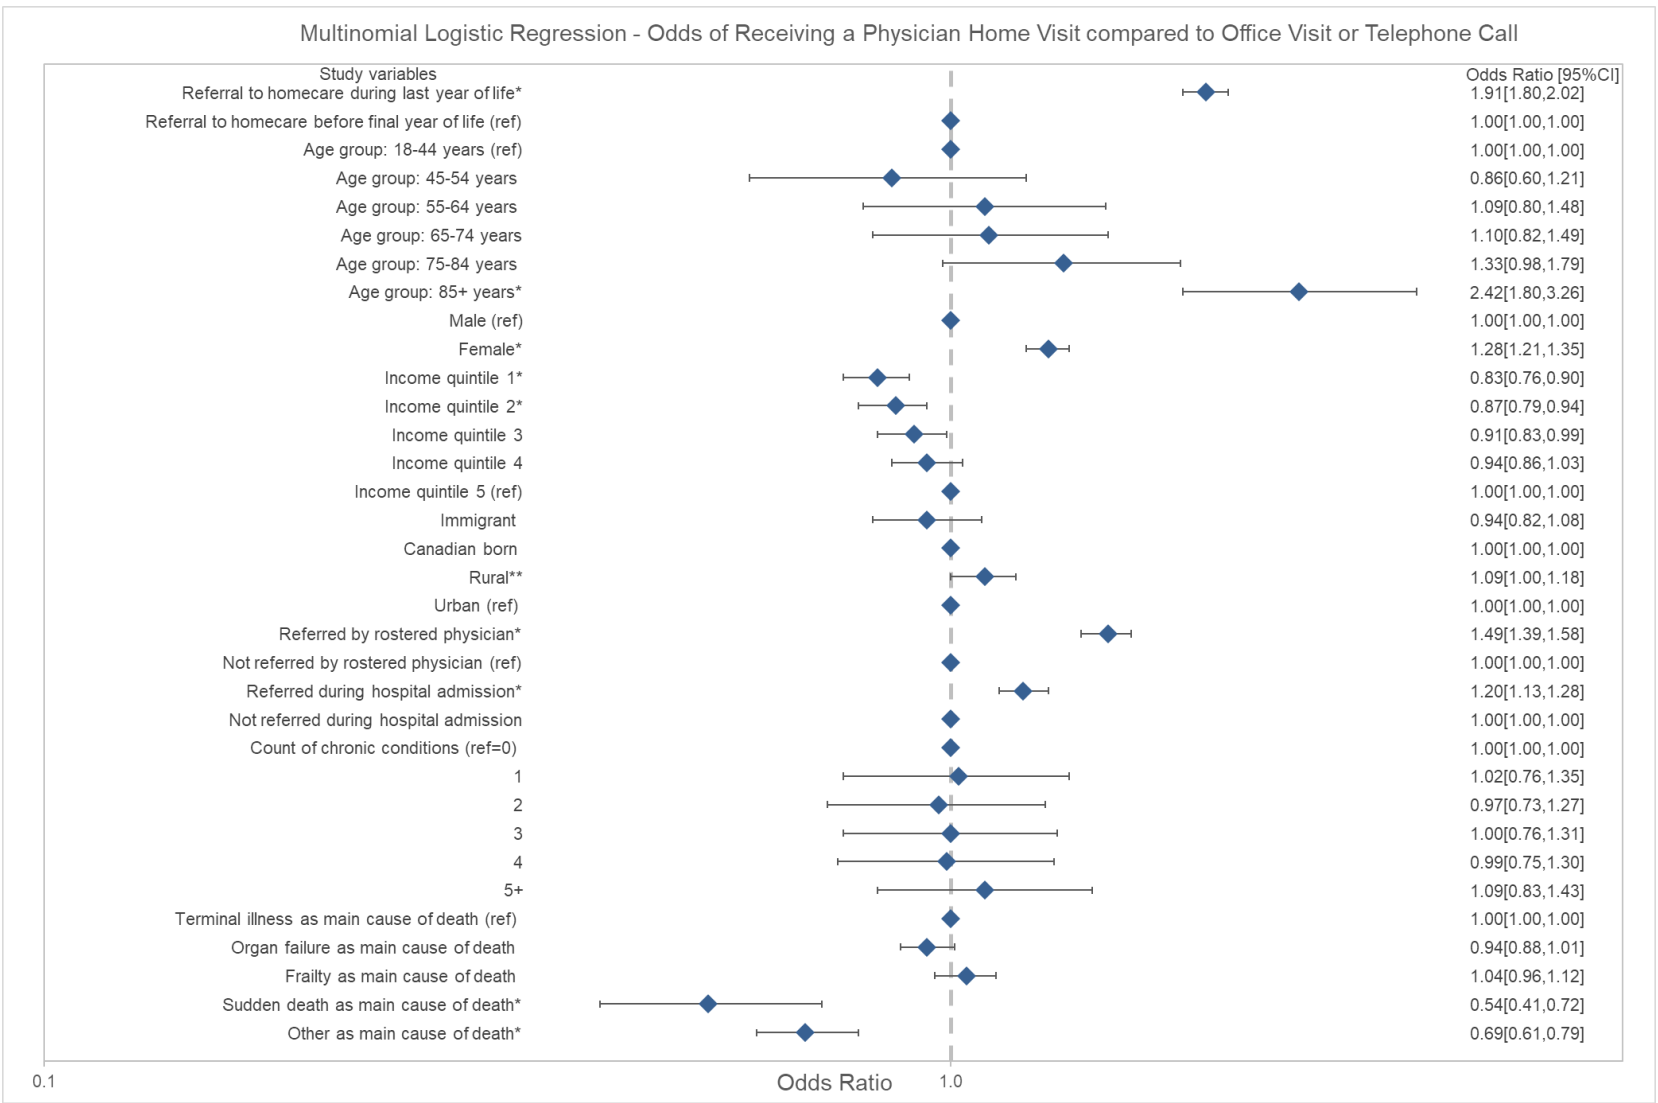

Figure 1a: Results of a multinomial logistic regression on receiving a home visit from patient’s rostered primary care physician after referral to home care services for those who died between 2013-2018 in Ontario compared to receiving other community-based care from rostered physicians.

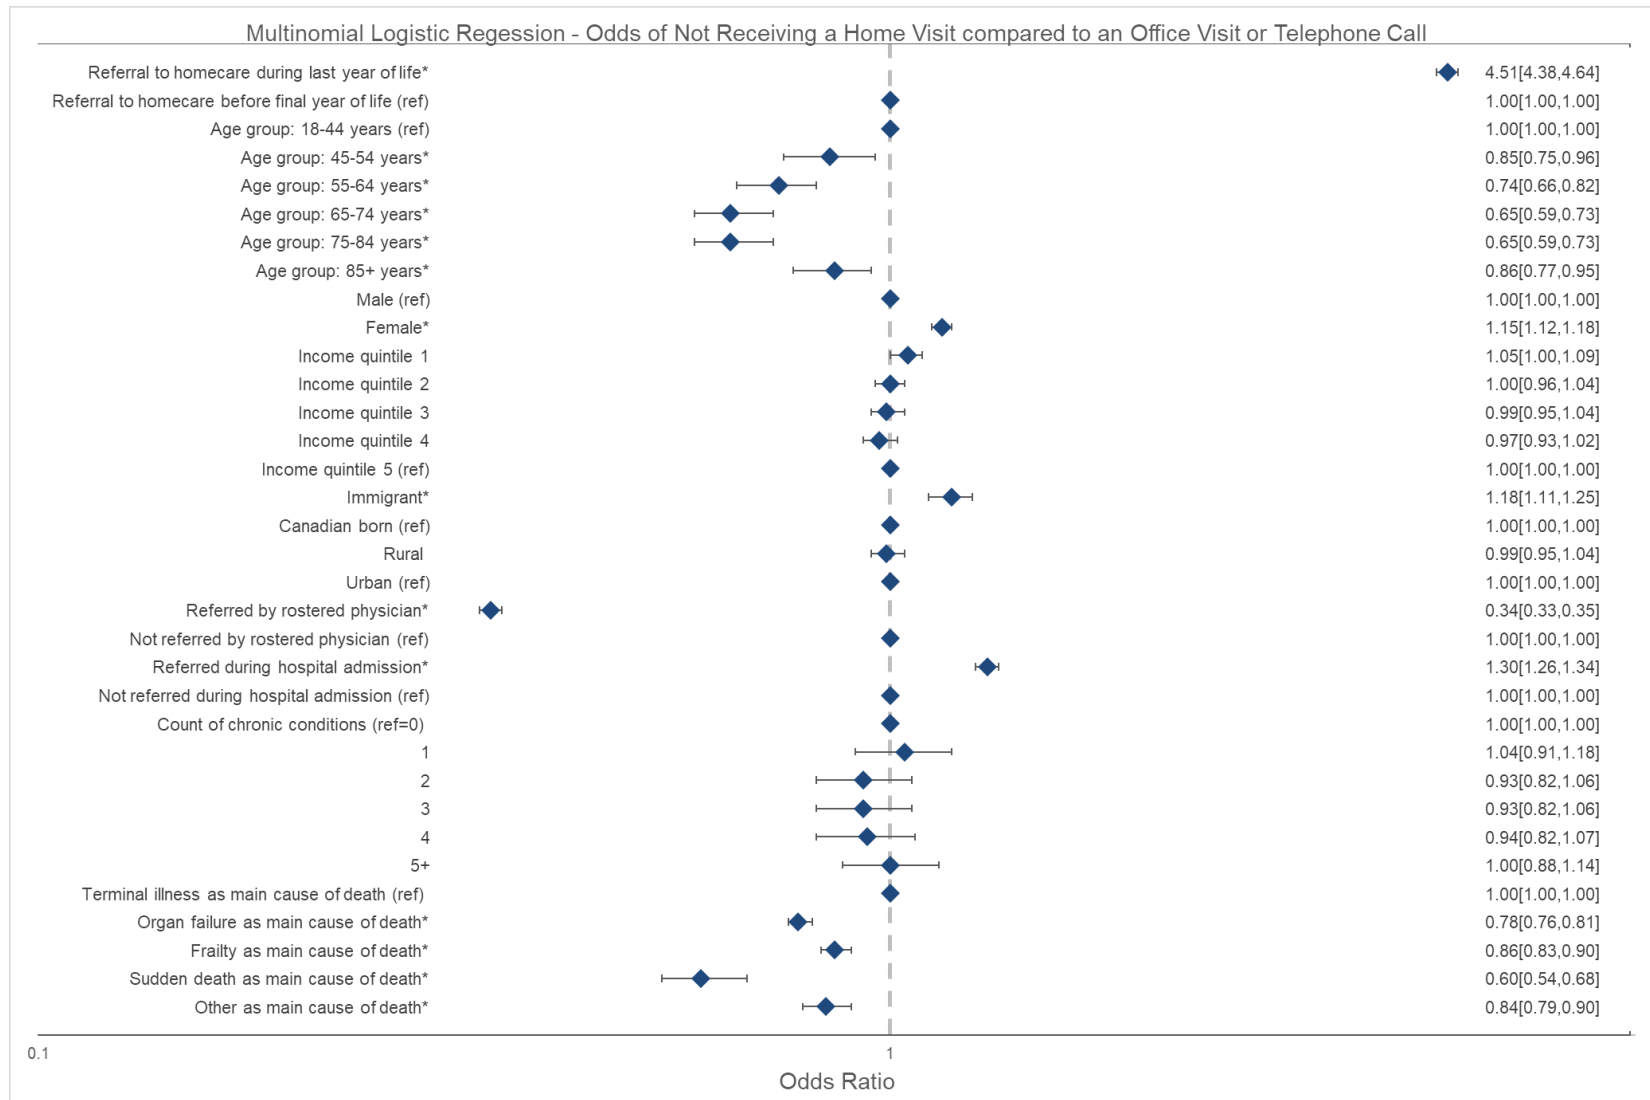

Figure 1b: Results of a multinomial logistic regression on not receiving a home visit from patient's rostered primary care physician after referral to home care services for those who died between 2013-2018 in Ontario compared to receiving other community-based care from rostered physicians.

1  
2  
3  
4  
5  
6  
7  
8  
9  
10  
11  
12  
13  
14  
15  
16  
17  
18  
19  
20  
21  
22  
23  
24  
25  
26  
27  
28  
29  
30  
31  
32  
33  
34  
35  
36  
37  
38  
39  
40  
41  
42  
43  
44  
45  
46  
47  
48  
49  
50  
51  
52  
53  
54  
55  
56  
57  
58  
59  
60

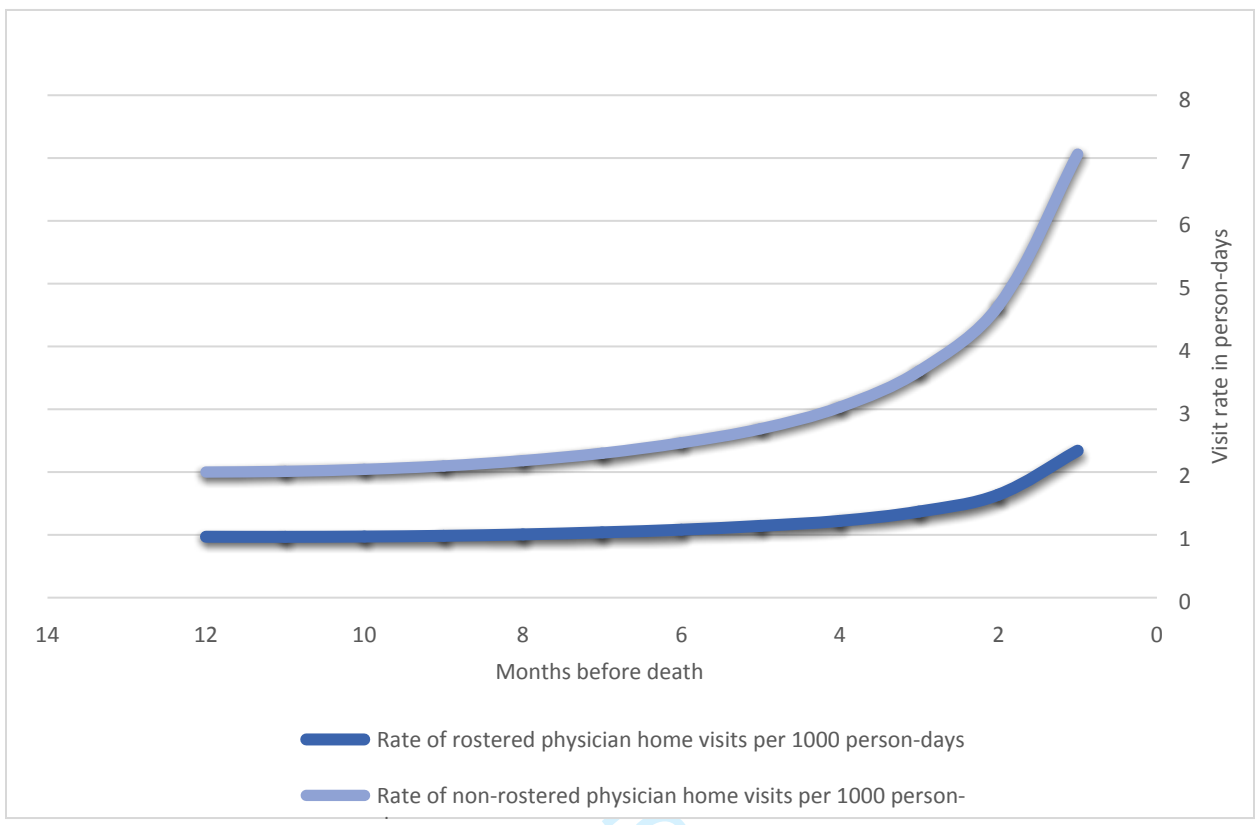

Figure 1: Rate of home visits per 1000 person-days by month delivered to patients during their last year of life by rostered and non-rostered physicians after patients' referral to publicly funded homecare services in Ontario between 2013-2018

Appendix I: Cohort creation

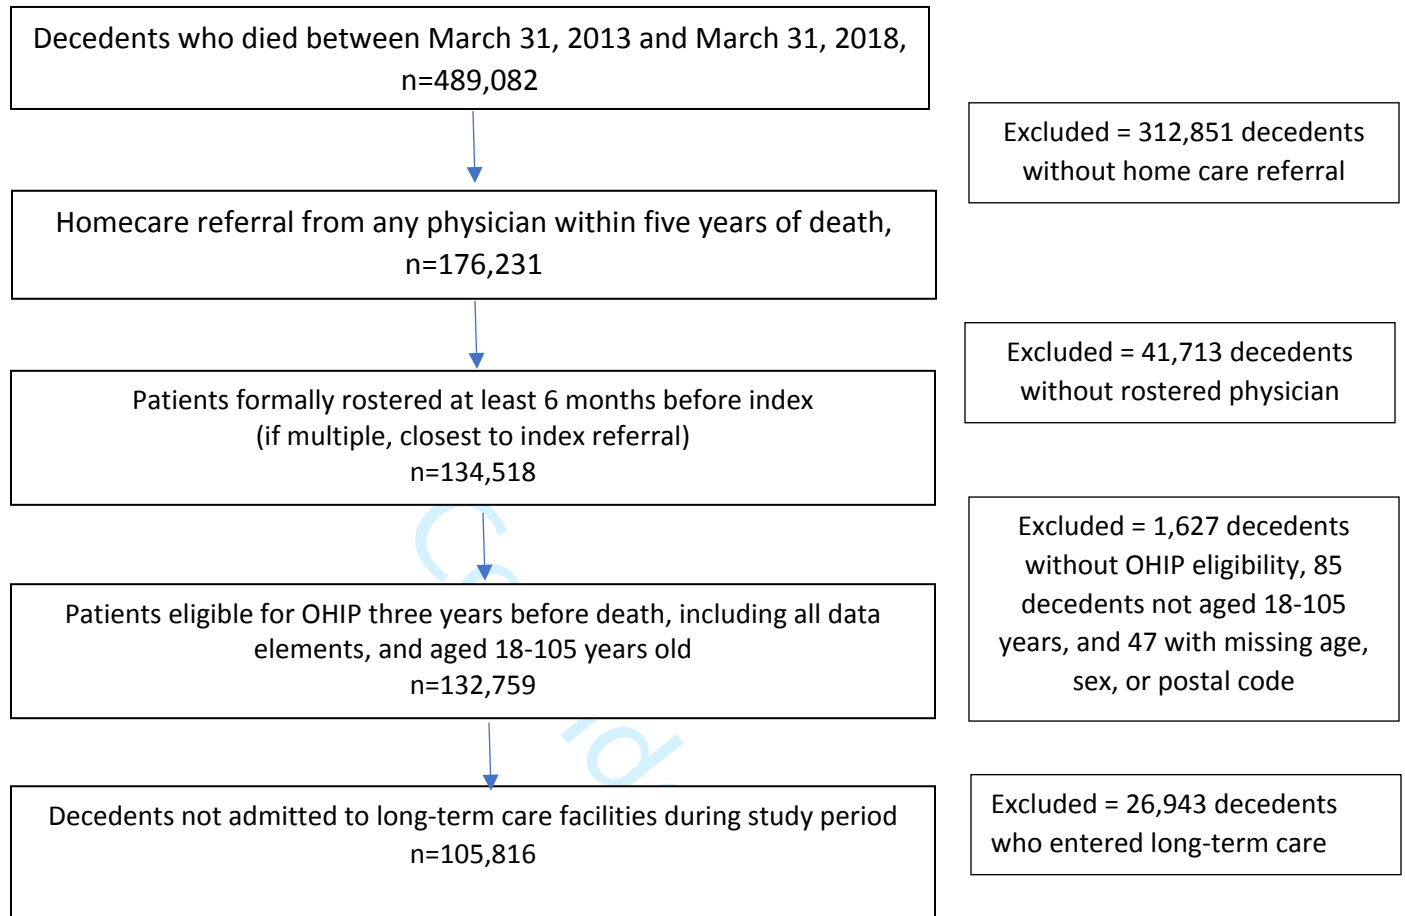

## Appendix II: ICES databases description and included study variables

| ICES Databases                                        | Description                                                                                                                                                                                                                                                                                                                                                                                                   | Study variables                                                                                               |
|-------------------------------------------------------|---------------------------------------------------------------------------------------------------------------------------------------------------------------------------------------------------------------------------------------------------------------------------------------------------------------------------------------------------------------------------------------------------------------|---------------------------------------------------------------------------------------------------------------|
| Client Agency Program Enrolment (CAPE) Database       | CAPE provides information on primary care physicians' care organization and remuneration model. This data was provided annually by the Ontario Ministry of Health and Long-Term Care (MOHLTC).                                                                                                                                                                                                                | Rostered physician status                                                                                     |
| Continuing Care Reporting System (CCRS)               | The CCRS is a dataset that reports on individuals living in institutional long-term care settings. This data is provided quarterly by the Ontario Ministry of Health and Long-Term Care (MOHLTC).                                                                                                                                                                                                             | Excluded those in institutional care post index referral to homecare                                          |
| Discharge Abstract Database (DAD)                     | The DAD includes information on all hospitalizations based on a retrospective chart review including International Classification of Diseases-10 (ICD-10) diagnoses codes (up to 16 diagnoses codes for each discharge record), procedures performed during hospitalization, physician providing care, hospital administrative information, and patients' demographic information.                            | Hospitalizations post index referral to homecare, previous treatment to identify prevalent chronic conditions |
| Homecare Database (HCD)                               | The HCD contains information on those receiving publicly funded non-physician home care services.                                                                                                                                                                                                                                                                                                             | Used to determine the location of visits                                                                      |
| ICES Physician Database (IPDB)                        | An ICES derived database with information on Ontario physicians including demographics, specialty, workload, services provided and location. This dataset is updated annually from OHIP, Corporate Provider Database (CPDB), and the Ontario Physician Human Resource Data Centre (OPHRDC) database.                                                                                                          | Physician specialty                                                                                           |
| The Immigrant, Refugees and Citizenship Canada (IRCC) | IRCC includes immigration application records for individuals who originally landed in Ontario, Canada dating back to 1985. The main variables in this dataset include country of citizenship, level of education, mother tongue, and landing date. New immigrants who landed in Ontario and immediately moved to another province or those who moved from another province may not be captured in this data. | Patient immigration status                                                                                    |
| National Ambulatory Care Reporting System (NACRS)     | The NACRS holds data on visits to healthcare institutions. This includes demographics, the setting visited (e.g. day surgery, emergency department, cancer care unit), and clinical data (e.g. diagnosis, treatment).                                                                                                                                                                                         | Recent emergency department visits post index referral to homecare                                            |
| Ontario Health Insurance Plan (OHIP) Claims Database  | The OHIP database holds all billing claims paid for by the Ontario Health Insurance Plan. Each record represents the delivery of a service from a particular physician to a particular patient and includes the date, the fee paid, and the number of times it was billed.                                                                                                                                    | Home visit delivery (primary outcome), office and management codes, palliative care physician designation.    |

|                                                                                                                                                                                                                                                                      |                                                                       |                                                                                                                                                                                                                                                                                                                                              |                                                                               |
|----------------------------------------------------------------------------------------------------------------------------------------------------------------------------------------------------------------------------------------------------------------------|-----------------------------------------------------------------------|----------------------------------------------------------------------------------------------------------------------------------------------------------------------------------------------------------------------------------------------------------------------------------------------------------------------------------------------|-------------------------------------------------------------------------------|
| 1<br>2<br>3<br>4<br>5<br>6<br>7<br>8                                                                                                                                                                                                                                 | Ontario Registrar<br>General Death<br>(ORGD)                          | The ORGD is the registrar for all deaths in Ontario and reports the date of death, cause of death, and characteristics of the deceased. Data is updated annually for fact of death, with subsequent updates for cause of death as information becomes available.                                                                             | Cause of death – disease trajectory.                                          |
| 9<br>10<br>11<br>12<br>13<br>14<br>15<br>16                                                                                                                                                                                                                          | Statistics Canada's<br>Postal Code<br>Conversion File<br>Plus (PCCF+) | This is an ICES derived macro designed to link PCCF files to other census geographic identifiers and was used to create urban/rural flags, neighbourhood income quintiles, dissemination area/enumeration area, census division, and latitude/longitude. This macro is updated according to changes in census data from which it is derived. | Converts postal code from the RPDB to determine: Rurality and Income quintile |
| 17<br>18<br>19<br>20<br>21<br>22<br>23<br>24<br>25<br>26<br>27<br>28<br>29<br>30<br>31<br>32<br>33<br>34<br>35<br>36<br>37<br>38<br>39<br>40<br>41<br>42<br>43<br>44<br>45<br>46<br>47<br>48<br>49<br>50<br>51<br>52<br>53<br>54<br>55<br>56<br>57<br>58<br>59<br>60 | Registered Persons<br>Database (RPDB)                                 | The RPDB holds information on each individual who has ever had an active Ontario health card number. This data was provided by the Ministry of Health and Long-Term Care (MOHLTC). The most relevant information in this dataset are demographic information, geographic information, and eligibility of OHIP coverage.                      | Patient's age, sex, postal code (if applicable)                               |

Confidential



Appendix III: Characteristics of visits to patients in their last year of life according to patient's illness trajectory

|                                                                                      | <b>Total</b>      | <b>Terminal illness</b> | <b>Organ Failure</b> | <b>Frailty</b>   | <b>Sudden death</b> | <b>Other</b>     |
|--------------------------------------------------------------------------------------|-------------------|-------------------------|----------------------|------------------|---------------------|------------------|
| Total n                                                                              | N=58,242          | N=29,858                | N=16,149             | N=8,741          | N=615               | N=2,879          |
| Proportion                                                                           | 100%              | 51.3%                   | 27.7%                | 15.0%            | 1.1%                | 4.9%             |
| Number of visits from rostered physicians in the last year of life (mean, SD)        | 1.28<br>(3.63)    | 1.08 (3.49)             | 1.51<br>(3.79)       | 1.57<br>(3.97)   | 1.53<br>(3.37)      | 1.19<br>(2.93)   |
| Patients who received home care from non-rostered physicians, n (%)                  | 24,995<br>(42.9%) | 14,048<br>(47.0%)       | 6,209<br>(38.4%)     | 3,403<br>(38.9%) | 300<br>(48.8%)      | 1,035<br>(35.9%) |
| Palliative care specialists, n (%)                                                   | 10,241<br>(17.6%) | 8,214<br>(27.5%)        | 1,229<br>(7.6%)      | 584<br>(6.7%)    | 28 (4.6%)           | 186<br>(6.5%)    |
| Palliative care generalists, n (%)                                                   | 18,517<br>(31.8%) | 10,183<br>(34.1%)       | 4,730<br>(29.3%)     | 2,553<br>(29.2%) | 225<br>(36.6%)      | 826<br>(28.7%)   |
| Other family physicians, n (%)                                                       | 3,500<br>(6.0%)   | 1,373<br>(4.6%)         | 1,157<br>(7.2%)      | 665<br>(7.6%)    | 97<br>(15.8%)       | 208<br>(7.2%)    |
| All other specialties (non palliative)                                               | 19,005<br>(32.6%) | 9,702<br>(32.5%)        | 5,321<br>(32.9%)     | 2,808<br>(32.1%) | 283<br>(46.0%)      | 891<br>(30.9%)   |
| Number of visits from palliative care specialist physicians (mean, SD)               | 1.70<br>(7.11)    | 2.78 (9.08)             | 0.61<br>(3.95)       | 0.51<br>(3.50)   | 0.43<br>(3.83)      | 0.54<br>(3.86)   |
| Number of visits from palliative care generalist physicians (mean, SD)               | 1.83<br>(5.37)    | 2.10 (5.78)             | 1.57<br>(5.02)       | 1.44<br>(4.65)   | 2.18<br>(6.07)      | 1.62<br>(4.58)   |
| Number of visits from other family physicians (mean, SD)                             | 0.19<br>(1.49)    | 0.13 (1.10)             | 0.24<br>(1.73)       | 0.26<br>(1.81)   | 0.80<br>(3.88)      | 0.23<br>(1.51)   |
| Patients referred during hospital admission, n (%)                                   | 22,254<br>(38.2%) | 10,854<br>(36.4%)       | 6,525<br>(40.4%)     | 3,444<br>(39.4%) | 243<br>(39.5%)      | 1,188<br>(41.3%) |
| Number of hospitalizations post index referral to homecare (mean, SD)                | 1.67<br>(1.37)    | 1.59 (1.35)             | 1.81<br>(1.46)       | 1.63<br>(1.32)   | 1.54<br>(1.48)      | 1.73<br>(1.18)   |
| Patients referred by palliative specialist during hospital admission, n (%)          | 2,028<br>(3.5%)   | 1,546<br>(5.2%)         | 294<br>(1.8%)        | 143<br>(1.6%)    | *1-5                | *40-44           |
| Number of hospital admissions with palliative care (mean, SD)                        | 0.28<br>(0.51)    | 0.36 (0.57)             | 0.20<br>(0.43)       | 0.17<br>(0.40)   | 0.10<br>(0.32)      | 0.16<br>(0.39)   |
| Patients referred by rostered physician during hospital admission, n (%)             | 900<br>(1.5%)     | 389 (1.3%)              | 332<br>(2.1%)        | 135<br>(1.5%)    | 6 (1.0%)            | 38 (1.3%)        |
| Patients referred by a rostered physician at any time in last 5 years of life, n (%) | 11,463<br>(19.7%) | 4,345<br>(14.6%)        | 4,147<br>(25.7%)     | 2,233<br>(25.5%) | 121<br>(19.7%)      | 617<br>(21.4%)   |
| Incidence rate of home visits post index (rostered physicians), mean (SD)            | 0.27<br>(2.75)    | 0.27 (2.79)             | 0.27<br>(2.89)       | 0.32<br>(2.78)   | 0.07<br>(0.57)      | 0.14<br>(1.48)   |

|                               |        |             |        |        |        |        |
|-------------------------------|--------|-------------|--------|--------|--------|--------|
| Incidence rate of home visits |        |             |        |        |        |        |
| post index (non-rostered      | 0.54   |             | 0.30   | 0.34   | 0.08   | 0.12   |
| physicians), mean (SD)        | (3.67) | 0.77 (4.47) | (2.56) | (2.95) | (0.69) | (1.03) |

\*range provided due to small cells which highly increase the risk of disclosure.

Legend: SD=Standard deviation

Confidential
